# Supplementary material for: ‘Ice’ flavoured e-cigarette use among young adults
Source: HighWire-hosted journal article supplement (doi:10.1136/tobaccocontrol-2020-056416), 2021-06-14
Supplement: tobaccocontrol-2020-056416supp001_data_supplement.pdf [file tobaccocontrol-2020-056416supp001_data_supplement.pdf]

**Appendix Figure 1: Flowchart for Participants Included in the Final Analytic Sample**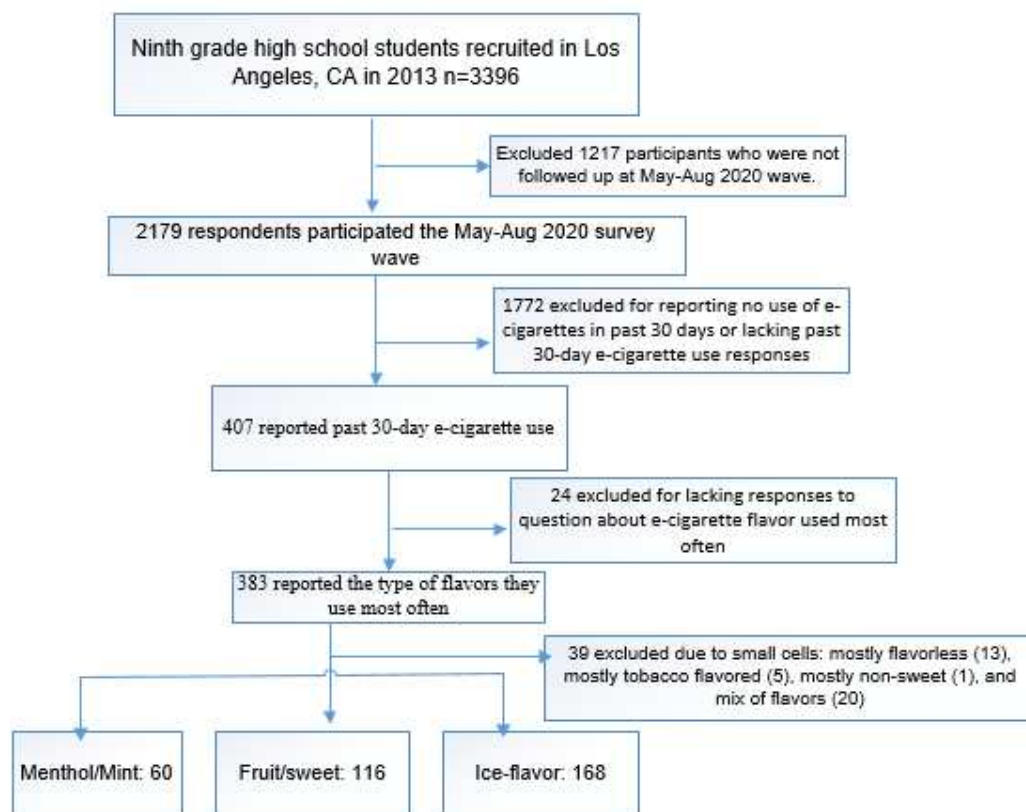

**Appendix Table 1: Sample Characteristics, Stratified by Flavored e-Cigarette Use Status**

|                                        | Overall <sup>a</sup> | Flavored e-Cigarette Use <sup>a</sup> |             |            | p-value <sup>b</sup> |
|----------------------------------------|----------------------|---------------------------------------|-------------|------------|----------------------|
|                                        |                      | Menthol/Mint                          | Fruit/Sweet | Ice        |                      |
|                                        | 344                  | 60 (17.4)                             | 116 (33.7)  | 168 (48.8) |                      |
| Age, Mean (SD)                         | 21.2 (0.4)           | 21.2 (0.3)                            | 21.2 (0.4)  | 21.2 (0.4) | .90                  |
| Sex, No. (%)                           |                      |                                       |             |            | <b>.009</b>          |
| Male                                   | 158 (45.9)           | 38 (63.3)                             | 46 (39.7)   | 74 (44.0)  |                      |
| Female                                 | 186 (54.1)           | 22 (36.7)                             | 70 (60.3)   | 94 (56.0)  |                      |
| Race/ethnicity, No. (%)                |                      |                                       |             |            | <b>&lt;.001</b>      |
| Non Hispanic White                     | 66 (19.6)            | 6 (10.3)                              | 31 (27.2)   | 29 (17.7)  |                      |
| Non Hispanic Black                     | 12 (3.6)             | 2 (3.4)                               | 6 (5.3)     | 4 (2.4)    |                      |
| Hispanic                               | 136 (40.5)           | 24 (41.4)                             | 62 (54.4)   | 50 (30.5)  |                      |
| Asian                                  | 65 (19.3)            | 13 (22.4)                             | 9 (7.9)     | 43 (26.2)  |                      |
| Other <sup>c</sup>                     | 57 (17.0)            | 13 (22.4)                             | 6 (5.3)     | 38 (23.2)  |                      |
| In a degree program, No. (%)           |                      |                                       |             |            | .49                  |
| No                                     | 127 (38.4)           | 20 (34.5)                             | 47 (42.7)   | 60 (36.8)  |                      |
| Yes                                    | 204 (61.6)           | 38 (65.5)                             | 63 (57.3)   | 103 (63.2) |                      |
| Living with parents, No. (%)           |                      |                                       |             |            | .50                  |
| No                                     | 110 (33.2)           | 23 (39.7)                             | 34 (30.9)   | 53 (32.5)  |                      |
| Yes                                    | 221 (66.8)           | 35 (60.3)                             | 76 (69.1)   | 110 (67.5) |                      |
| Personal financial situation           |                      |                                       |             |            | .27                  |
| Live comfortably                       | 132 (40.1)           | 25 (43.1)                             | 37 (33.9)   | 70 (43.2)  |                      |
| Just meet or Don't meet basic expenses | 197 (59.9)           | 33 (56.9)                             | 72 (66.1)   | 92 (56.8)  |                      |
| Sexual minority, No. (%)               |                      |                                       |             |            | .54                  |
| Heterosexual                           | 247 (75.1)           | 42 (72.4)                             | 79 (72.5)   | 126 (77.8) |                      |
| Sexual minority                        | 82 (24.9)            | 16 (27.6)                             | 30 (27.5)   | 36 (22.2)  |                      |

Abbreviation P-value for ANOVA (age) or Chi-square test (remaining variables) for group comparisons of the respective outcome by e-cigarette flavor most often used.

<sup>a</sup> No. (Column %) are shown in the table.

<sup>b</sup> P-values were from chi-squared test for categorical variables and generalized linear regression for continuous variable.

<sup>c</sup> "Other" category includes those who reported their race/ethnicity as "American Indian or Alaska Native," "Native Hawaiian or Pacific Islander," "Multiracial," and "Other".

**Appendix Table 2: Transition in Flavor Use Between First Use and Current Use Status**

| Flavor at first use <sup>a</sup> | Flavor currently used most often <sup>b</sup> |           |           |
|----------------------------------|-----------------------------------------------|-----------|-----------|
|                                  | Menthol/Mint                                  | Sweet     | Ice       |
| Menthol/Mint (n=95) <sup>c</sup> | 28 (29.5)                                     | 24 (25.3) | 43 (45.3) |
| Sweet (n=154) <sup>c</sup>       | 24 (15.6)                                     | 74 (48.1) | 56 (36.4) |
| Ice (n=82) <sup>c</sup>          | 2 (2.4)                                       | 11 (13.4) | 69 (84.1) |

Values are N (row %)

<sup>a</sup>: Survey item: "Which flavor did you try first? (when vaping nicotine)?"

<sup>b</sup>: Survey item: "How would you best describe the types of favors you use most often (now)? (Select only one)?"

<sup>c</sup>: No. (Row %) are shown in the table.
